# Supplementary material
Source: Elsevier journal article supplement (https://www.sciencedirect.com/science/article/pii/S0210569117302206)
Supplement: mmc1 [file S0210569117302206:mmc1.pdf]

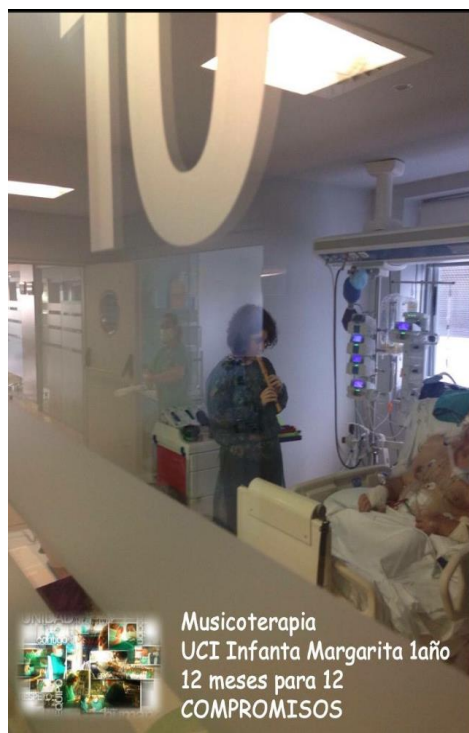

**FIGURA 1.** Sesión de musicoterapia en la UCI

**FIGURA 2A. Encuesta a los profesionales de la UCI sobre la apertura de horarios de visitas.**

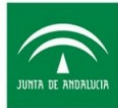

Servicio Andaluz de Salud  
CONSEJERÍA DE SALUD  
Hospital Infanta Margarita

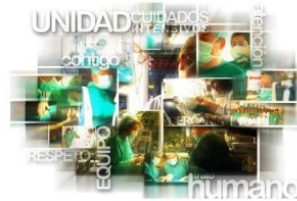

## ENCUESTA:

**Abrir la Unidad de Cuidados Intensivos a los familiares: ¿qué opinan los profesionales?**

**Objetivos de la encuesta:**

- Conocer el grado de acuerdo/desacuerdo con la propuesta de ampliación de horarios de visita
- Conocer las aportaciones y posibilidades de mejora
- Conocer las posibles barreras que existen para su implementación

**Política de visitas oficial en la actualidad**, con entrada máxima de 2 familiares sin posibilidad de intercambio:

- 8.00–8.15: la familia ve reducida su ansiedad al comprobar cómo ha pasado la noche su familiar
- 13.00–13.30: la familia se involucra en la toma de la comida
- 20.00–20.30: la familia se involucra en la toma de la cena

## **Propuesta de “UCI de Puertas Abiertas” de la Unidad de Cuidados Intensivos del Hospital Infanta Margarita.**

- Visita de las 8:00, como hasta ahora, dos familiares. incorporando **información de enfermería** acerca de cómo ha pasado la noche.
- Ampliar el horario de visita del **medio día, de 13:00 a 14:30h**. Dos familiares con posibilidad de **intercambiarse una vez** con otros dos. Esta ampliación, también conllevaría un **cambio en la rutina de información**, siendo lo más procedente informar a la familia antes de la visita o en los casos oportunos durante la visita. En muchas ocasiones, la familia vive la visita del medio día con ansiedad, pendiente de la información médica, de este modo, esto podría evitarse.
- Durante la tarde, se permite la estancia de un familiar desde las **18.00 hasta las 20h** para **acompañar** al paciente.
- De **20:00 a 21.00** habrá otra **visita**, de dos familiares.

Se explicará a los familiares que no tienen obligación de permanecer todo el tiempo junto al paciente y también que en ese período de tiempo es posible que los profesionales de salud le soliciten su salida de la unidad de manera temporal.

**FIGURA 2B. Encuesta a los profesionales de la UCI sobre la apertura de horarios de visitas**

De esta manera, pretendemos disminuir la ansiedad del paciente al, disminuir la ansiedad de la familia al permanecer un representante al lado del paciente, mejorar la comunicación entre el equipo asistencial y la familia, y dar visibilidad al trabajo ininterrumpido de cuidados que en nuestra Unidad se realiza.  
Con el objeto de controlar el acceso, se les facilitará una **tarjeta de acompañante**.

**Profesional**

|           |          |
|-----------|----------|
| Medico    | Auxiliar |
| Enfermera | Celador  |

**Tiempo trabajado en UCI**

< 5 años

De 5 a 10 años

>10 años

|                                                         |                                     |                 |
|---------------------------------------------------------|-------------------------------------|-----------------|
| De <b>acuerdo</b> con la propuesta<br><b>desacuerdo</b> | En <b>desacuerdo</b> (es mejorable) | En <b>total</b> |
|---------------------------------------------------------|-------------------------------------|-----------------|

Cómo cree que podría mejorarse

Cuáles cree que son las principales barreras para poder implantarse

**FIGURA 3A. Encuesta a los familiares de los pacientes ingresados en la UCI.**

Servicio Andaluz de Salud  
CONSEJERÍA DE SALUD

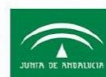

Hospital Infanta Margarita  
Avda. de Góngora s/n 14940 Cabra - Córdoba  
Tel.: 957 021 300. Fax.: 957 021 322

### ENCUESTA DE SATISFACCIÓN DE FAMILIARES EN CUIDADOS INTENSIVOS

Refleje su opinión, marcando con una cruz, sobre los siguientes aspectos de la Unidad y deposite el cuestionario en el buzón situado a la entrada de la UCI.

#### INSTALACIONES Y SERVICIOS

|                                | Malo                     | Regular                  | Normal                   | Bueno                    | Muy Bueno                |
|--------------------------------|--------------------------|--------------------------|--------------------------|--------------------------|--------------------------|
| • Sala de espera de familiares | <input type="checkbox"/> |
| • Sala de información          | <input type="checkbox"/> |
| • Limpieza de la Unidad        | <input type="checkbox"/> |
| • Orden en la Unidad           | <input type="checkbox"/> |
| • Aseo del paciente            | <input type="checkbox"/> |
| • Nivel de Ruidos              | <input type="checkbox"/> |
| • Iluminación                  | <input type="checkbox"/> |
| • Comodidad (cama)             | <input type="checkbox"/> |
| • Grado de intimidad           | <input type="checkbox"/> |

#### RELACIÓN CON EL PERSONAL MÉDICO

- ¿Conoce el nombre de los Médicos que le han atendido? ☐ SI ☐ NO

Refleje su opinión, marcando con una cruz, sobre los siguientes aspectos de su relación con el personal médico:

|                                                       | Malo                     | Regular                  | Normal                   | Bueno                    | Muy Bueno                |
|-------------------------------------------------------|--------------------------|--------------------------|--------------------------|--------------------------|--------------------------|
| • Tiempo que le ha dedicado                           | <input type="checkbox"/> |
| • Amabilidad y cortesía en el trato                   | <input type="checkbox"/> |
| • Confianza y seguridad que le ha inspirado           | <input type="checkbox"/> |
| • Preparación y profesionalidad                       | <input type="checkbox"/> |
| • Información recibida sobre su enfermedad            | <input type="checkbox"/> |
| • Información recibida sobre las pruebas diagnósticas | <input type="checkbox"/> |
| • Información sobre el tratamiento                    | <input type="checkbox"/> |

**FIGURA 3B. Encuesta a los familiares de los pacientes ingresados en la UCI.**

**RELACIÓN CON EL PERSONAL DE ENFERMERÍA**

- ¿Conoce el nombre de los enfermeros/as que le han atendido? ☐ SI ☐ NO

Refleje su opinión, marcando con una cruz, sobre los siguientes aspectos de su relación con el personal de enfermería:

|                                                         | Malo                     | Regular                  | Normal                   | Bueno                    | Muy Bueno                |
|---------------------------------------------------------|--------------------------|--------------------------|--------------------------|--------------------------|--------------------------|
| • Tiempo que le han dedicado                            | <input type="checkbox"/> |
| • Amabilidad y cortesía en el trato                     | <input type="checkbox"/> |
| • Confianza y seguridad que le han inspirado            | <input type="checkbox"/> |
| • Preparación y profesionalidad                         | <input type="checkbox"/> |
| • Información sobre normas y horarios                   | <input type="checkbox"/> |
| • Información sobre los cuidados del paciente           | <input type="checkbox"/> |
| • Ayuda para facilitar la comunicación con el paciente. | <input type="checkbox"/> |

**EN RELACIÓN A LAS VISITAS:**

|                                      | Malo                     | Regular                  | Normal                   | Bueno                    | Muy Bueno                |
|--------------------------------------|--------------------------|--------------------------|--------------------------|--------------------------|--------------------------|
| • Horario de visitas                 | <input type="checkbox"/> |
| • Tiempo programado para las visitas | <input type="checkbox"/> |
| • Número de familiares permitidos.   | <input type="checkbox"/> |

**VALORACIÓN GLOBAL DEL SERVICIO DE CUIDADOS INTENSIVOS:**

| Malo                     | Regular                  | Normal                   | Bueno                    | Muy Bueno                |
|--------------------------|--------------------------|--------------------------|--------------------------|--------------------------|
| <input type="checkbox"/> |

Si desea añadir algo más, hágalo en el siguiente espacio

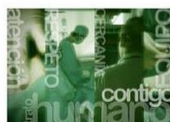

**MUCHAS GRACIAS POR SU COLABORACIÓN.**

**FIGURA 4A. Encuesta a los profesionales del área sanitaria**

ENCUESTA SOBRE PERCEPCION DEL PERSONAL SANITARIO  
ACERCA DE LA UNIDAD DE CUIDADOS INTENSIVOS DEL HOSPITAL  
INFANTA MARGARITA

Estimado compañero/a:

El personal de la UCI está interesado en conocer la percepción del resto de profesionales sobre los Cuidados Intensivos prestados en nuestro hospital, con el propósito de detectar factores de mejora.

Con este fin, le solicitamos su colaboración con la seguridad de que nos será de gran utilidad.

Su colaboración es voluntaria, anónima y toda la información que nos aporte será tratada de forma confidencial.

Muchas gracias

Categoría profesional

Facultativo

Enfermería

Auxiliares

Otros

Tiempo trabajado

Ha tenido contacto profesional con el servicio de Medicina Intensiva:

Ha trasladado algún paciente a la UCI

Si

No

Ha solicitado valoración de algún paciente a UCI

Si

No

Ha recibido algún paciente de la UCI

Si

No

Ha trabajado en alguna UCI

Si

No

Valoración de la UCI y su equipo profesional. Indique del 0 (muy mal) al 10 (muy bueno):

Preparación:

Facultativos

Enfermería

Auxiliares de Enfermería

Resto

Capacidad de comunicación:

Facultativos

Enfermería

Auxiliares de Enfermería

Resto

Trato personal

Facultativos

Enfermería

Auxiliares de Enfermería

Resto

Calidad de la estructura y medios técnicos disponibles

**FIGURA 4B. Encuesta a los profesionales del área sanitaria**

**PARA PERSONAL FACULTATIVO**

Se le ha denegado el traslado a UCI de algún paciente que creía subsidiario de tratamiento intensivo ☐ Si ☐ No

Está conforme con los argumentos que le dieron para no ingresarlo ☐ Si ☐ No

Pese a no ingresarse los facultativos de Uci prestaron una correcta colaboración con usted en la atención del paciente ☐ Si ☐ No

De las razones que se le han dado para NO ingresar, cual o cuales le parecen más justificadas:

|                   |                             |                             |
|-------------------|-----------------------------|-----------------------------|
| Edad,             | <input type="checkbox"/> Si | <input type="checkbox"/> No |
| Situación previa, | <input type="checkbox"/> Si | <input type="checkbox"/> No |
| Pronostico,       | <input type="checkbox"/> Si | <input type="checkbox"/> No |
| Secuelas,         | <input type="checkbox"/> Si | <input type="checkbox"/> No |

¿Cree Usted que la presión familiar es un motivo justificado para solicitar valoración del paciente por el Intensivista? ☐ Si ☐ No

Si desea añadir algo más, hágalo en el siguiente espacio

MUCHAS GRACIAS POR SU COLABORACIÓN.

UCI Infanta Margarita, Proyecto 1 año, 12 meses para 12 compromisos

Noviembre: UNA UCI PARA TODOS. TU OPINION NOS IMPORTA

FIGURA 5A. UCI de puertas abiertas un año después

La presencia de familias en la UCI durante mas horas, le ha supuesto:

|                                                                      | SI                       | NO                       |
|----------------------------------------------------------------------|--------------------------|--------------------------|
| Mayor carga de trabajo                                               | <input type="checkbox"/> | <input type="checkbox"/> |
| Mayor demanda de información                                         | <input type="checkbox"/> | <input type="checkbox"/> |
| Ha interferido en la exploración, rutinas de cuidados, protocolos... | <input type="checkbox"/> | <input type="checkbox"/> |
| Incomodidad al realizar su trabajo                                   | <input type="checkbox"/> | <input type="checkbox"/> |
| Empeora la comunicación                                              | <input type="checkbox"/> | <input type="checkbox"/> |
| Mejora en la comunicación con la familia                             | <input type="checkbox"/> | <input type="checkbox"/> |

¿Cree que podría mejorarse?, ¿Como?

---

---

Cuáles cree que son las principales barreras encontradas

---

---

¿Volveria a la la Política de visitas previa, mas restrictiva? Si ☐ No ☐

---

Gracias, tu opinión importa, porque tú eres H-UCI

**FIGURA 5B. UCI de puertas abiertas un año después**

## ENCUESTA

### Un año de UCI de puertas abiertas, qué ha supuesto para los profesionales de la UCI

- Conocer el grado de acuerdo/desacuerdo con la propuesta de visitas/acompañamiento llevada a cabo en el último año
- Conocer las aportaciones y posibilidades de mejora tras un año de rodaje
- Conocer las posibles barreras o complicaciones que han surgido desde su implementación

#### Propuesta implantada

- Visita de las 8:00, dos familiares. incorporando **información de enfermería** acerca de cómo ha pasado la noche.
- Ampliación el horario de visita del **medio día, de 13:00 a 14:30h**. Dos familiares con posibilidad de **intercambiarse una vez** con otros dos.
- Durante la tarde, se permite la estancia de un familiar desde las **18.00 hasta las 20h** para **acompañar** al paciente.
- De **20:00 a 21.00** habrá otra **visita**, de dos familiares, con posibilidad de intercambio.

#### Profesional

Médico

☐

Auxiliar

☐

Enfermera

☐

Celador

☐

#### Hace un año, estuvo usted:

De **acuerdo** con la propuesta

En **desacuerdo** (es mejorable)

En **total desacuerdo**

☐
☐
☐

#### Después de este año, le ha parecido un cambio:

Positivo

☐

Negativo

☐

Indiferente

☐



[
